# Supplementary material for: Stable isotope analysis of dietary arginine accrual and disposal efficiency in male rats fed diets with different protein content
Source: Royal Society of Chemistry journal article supplement (doi:10.1039/c6ra11039h), 2016-01-01
Supplement: c6ra11039h1.pdf [file c6ra11039h1.pdf]

Supplemental Table 1. Fatty acid content in the diets.

| parameter                 | diets |      |      |
|---------------------------|-------|------|------|
|                           | SD    | CD   | HPF  |
| Fatty acid content (g/kg) |       |      |      |
| Saturated                 |       |      |      |
| C10                       | -     | 2.01 | -    |
| C12                       | 0.21  | 12.0 | 0.09 |
| C14                       | 0.34  | 5.66 | 0.13 |
| C16                       | 6.91  | 29.9 | 5.95 |
| C18                       | 0.51  | 12.2 | 0.76 |
| C20                       | 0.07  | 1.41 | 0.06 |
| C22                       | -     | 2.35 | -    |
| C24                       | -     | 3.57 | -    |
| Monounsaturated           |       |      |      |
| C16:1                     | -     | 2.39 | -    |
| C18:1                     | 5.78  | 43.3 | 6.51 |
| C20:1                     | 0.14  | 1.55 | 0.13 |
| C22:1                     | -     | 1.15 | -    |
| Polyunsaturated           |       |      |      |
| C18:2                     | 23.9  | 11.0 | 23.5 |
| C18:3                     | 1.97  | 1.10 | 1.59 |
| C20:4                     | -     | 0.96 | -    |

The data are presented in  $\text{g}\cdot\text{kg}^{-1}$ . The data corresponding to CD were calculated from the composition of the mean diet (i.e. mix of foods) intake.
