# Supplementary material for: Stable isotope analysis of dietary arginine accrual and disposal efficiency in male rats fed diets with different protein content
Source: Royal Society of Chemistry journal article supplement (doi:10.1039/c6ra11039h), 2016-01-01
Supplement: c6ra11039h2.pdf [file c6ra11039h2.pdf]

Supplemental Table 2. Weight of organs and tissues from rats subjected to different diets.

| parameter              | units | diets                    |                          |                          | P       |
|------------------------|-------|--------------------------|--------------------------|--------------------------|---------|
|                        |       | SD                       | CD                       | HPD                      |         |
| Liver                  | g     | 16.3 ± 0.5 <sup>AB</sup> | 18.5 ± 0.8 <sup>A</sup>  | 15.4 ± 0.8 <sup>B</sup>  | 0.0156  |
| Kidney                 | g     | 2.71 ± 0.05 <sup>A</sup> | 3.15 ± 0.14 <sup>A</sup> | 3.04 ± 0.09 <sup>A</sup> | NS      |
| Epididimal<br>WAT      | g     | 9.63 ± 1.33 <sup>A</sup> | 14.7 ± 1.3 <sup>B</sup>  | 7.53 ± 0.76 <sup>C</sup> | <0.0001 |
| Retroperitoneal<br>WAT | g     | 7.51 ± 2.27 <sup>A</sup> | 15.4 ± 1.14 <sup>B</sup> | 6.98 ± 0.63 <sup>A</sup> | 0.0019  |
| Mesenteric<br>WAT      | g     | 4.21 ± 0.35 <sup>A</sup> | 8.41 ± 0.83 <sup>B</sup> | 4.35 ± 0.34 <sup>A</sup> | 0.0112  |
| Σ 3 WAT sites          | g     | 21.5 ± 1.8 <sup>A</sup>  | 37.9 ± 2.4 <sup>B</sup>  | 18.8 ± 2.2 <sup>A</sup>  | <0.0001 |
| Small intestine        | g     | 9.74 ± 0.47 <sup>A</sup> | 9.24 ± 0.15 <sup>A</sup> | 7.84 ± 0.49 <sup>B</sup> | 0.0120  |

The data are the mean ± SE of six different animals. Statistical comparisons between groups: One-way ANOVA; post-hoc test (Tuckey test): groups with different superscript letters are statistically different (P<0.05); NS = not statistically significant.
